# Supplementary material for: New hybrid organic–inorganic nanocomposites based on functional [Ti16O16(OEt)24(OEMA)8] nano-fillers
Source: Royal Society of Chemistry journal article supplement (doi:10.1039/b502434j), 2005-01-01
Supplement: b502434j.pdf [file b502434j.pdf]

## SAMPLE PREPARATION AND CHARACTERIZATION

**Synthesis of  $\text{Ti}_{16}\text{O}_{16}(\text{OEt})_{32}$ ,  $[\text{Ti}_{16}]$ .** A mixture of 33.4 mmol of  $\text{Ti}(\text{OEt})_4$  dissolved in 7 mL of ethanol and 16.7 mmol of neutral water was placed in a steel autoclave at 100°C for 2 weeks. Crystals were isolated from the solution after slow cooling (1K/h) and further dried and stored in an inert atmosphere.

**Synthesis of  $[\text{Ti}_{16}\text{O}_{16}(\text{OEt})_{24}(\text{OEMA})_8]$ .**  $[\text{Ti}_{16}]$  (0.40 mmol) was dissolved in 10 mL of toluene, an excess of 2-hydroxyethyl methacrylate (25.6 mmol) was added and this mixture was placed at 50°C for 3 days. The final product is recovered after vacuum evaporation of the volatiles.

**Preparation of the hybrid organic-inorganic nanomaterials.** For UV curing the 2-hydroxy-2-methyl-1-phenyl-1-propanone (Darocur 1173) photoinitiator was used in a concentration of 4% wt. The mixtures were applied to a mould 1 mm-thick and polymerized with a polychromatic (312 nm, 360 nm, 410 nm, 440 nm, 550 nm, 575 nm) UV lamp 120 W/cm during 108 s.

**Determination of conversion by Near FT-IR spectroscopy.** Near InfraRed spectra were recorded on a Bruker Equinox 55 spectrometer. The conversion, defined as the percentage of total reacted double bond, was evaluated by the disappearance of first harmonic band of C-H of the methacrylic double bond between 6,098 and 6,238  $\text{cm}^{-1}$ .

**Dynamic mechanical analyses.** Viscoelastic properties were determined using a RSA II rheometer from Rheometric Scientific in tensile mode on thin films applying a dynamic strain of 0.05% at a given frequency of 1Hz. Measurements were performed during a temperature ramp from -100°C to 200°C at 4K.min<sup>-1</sup>. The dimensions of specimens were 23×5×1 mm<sup>3</sup>.

**Transmission Electron Microscopy.** TEM, was performed using a Philips CM120 microscope from Philips on microtomed sections of the cured polymethacrylate polymer and related nanomaterials.

**NMR spectroscopy.** <sup>17</sup>O spectra were recorded on a Bruker Avance 400 MHz spectrometer equipped with a 10-mm broadband probe head.

**FTIR spectroscopy.** The FTIR spectra were recorded on Nicolet Magna-IR Spectrometer 550 in the 4000-300  $\text{cm}^{-1}$  frequency range. Wavenumbers are expressed in reciprocal centimetres.

**EPR spectroscopy.** EPR spectra of the irradiated samples were recorded on a Bruker ESP 300E instrument at 77 K.

### Characterization of [Ti<sub>16</sub>O<sub>16</sub>(OEt)<sub>24</sub>(OEMA)<sub>8</sub>]

<sup>17</sup>O NMR (C<sub>6</sub>D<sub>6</sub>, δ ppm): 750 (4 μ<sub>2</sub>O), 570, 555 (8 μ<sub>3</sub>O), 380 (4 μ<sub>4</sub>O).

FTIR: 2950, 2880: ν(CH<sub>2</sub>,CH<sub>3</sub>), 1720 ν(COO), 1638 ν(C=C), 1472 ν(CH<sub>3</sub> asym), 1462 δ(CH<sub>2</sub>), 1377, 1356, 1296: δ(CH), 1210-1048 ν(C-OTi), large bande 580 ν(Ti-O-Ti). No vibrations due to carboxylate groups bonded to titanium, ν<sub>s</sub>(COO)=1453, ν<sub>asym</sub>(COO)=1538, were observed.

### Characterization of irradiated [Ti19.2] polymer

The EPR spectrum of irradiated hybrid material is shown in Fig. S1. These measurements were conducted at T=77 K. A comparison with results from Refs [1,2] gives evidence of a strong resonance due to Ti<sup>3+</sup> with correspondent perpendicular and parallel components g<sub>⊥</sub>=1.961 and g<sub>||</sub>=1.998.

Fig. S1: EPR spectrum of irradiated [Ti19.2] polymer

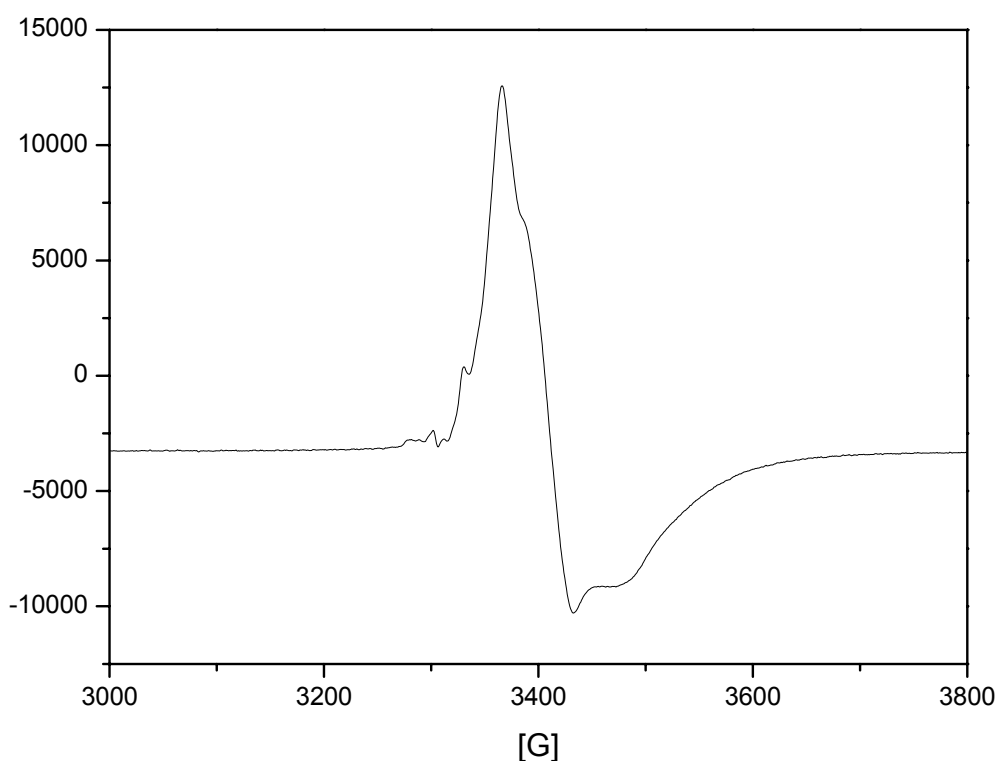

- 1 R. F. Howe and M. Grätzel, *J. Phys. Chem.*, 1985, **89**, 4495.
- 2 M. Grätzel and R. F. Howe, *J. Phys. Chem.*, 1990, **94**, 2566.
